# Supplementary material for: Low back and neck and shoulder pain in members and non-members of adolescents’ sports clubs: the Finnish Health Promoting Sports Club (FHPSC) study
Source: Springer Nature journal article supplement (doi:10.1186/s12891-016-1114-8), 2016-07-01
Supplement: MOESM1 [file 10330472]

## HEALTH PROMOTING SPORTS CLUB (HPSC) STUDY FOR SPORTS CLUB MEMBERS (15y)

---

Hi,

This is a survey for the Health Promoting Sports Club (HPSC) study. The study is carried out in collaboration with the University of Jyväskylä, UKK-Institute and Finnish Sports Medicine Centres.

Firstly, you are asked about your opinions about actions by your coach and your group/team.. Think back and contemplate the daily actions of your group/team during the ongoing season. Secondly, the next set of questions concern your health behaviours. For this study to be applicable, it is important that you answer the questions truthfully.

Your personal details and contact information are asked in the survey. It is important to fill in these details, so that answers can be linked to the other details collected during the study. By filling in your contact details, you can also take part in a film ticket draw.

- Answering time is approximately **45** minutes.
- All information in the survey is handled confidentially.
- No one else other than approved researchers has access to the questionnaires.
- The information you'll give, will be handled unnamed and reported as larger unities. Therefore, you can answer the questions with confidence.

Thank You for your contribution! Your answers are extremely important!

On behalf of the study group,

Sami Kokko  
Senior researcher  
University of Jyväskylä

Jari Parkkari  
Chief physician  
UKK-Institute,  
Tampere Research Center of Sports Medicine

**BACKGROUND INFORMATION**

Name: \_\_\_\_\_

Social security number: \_\_\_\_\_

Address: \_\_\_\_\_

Phone number: \_\_\_\_\_

E-mail: \_\_\_\_\_

**1. Today's Date:** \_\_\_\_/\_\_\_\_/ 2013**2. Gender**

- girl
- boy

**3. Year or birth** (e.g. 1997) \_\_\_\_\_**4. In what month are you born?**

- January
- February
- March
- April
- May
- June
- July
- August
- September
- October
- November
- December

**5. Height** \_\_\_\_\_ **cm****6. Weight** \_\_\_\_\_ **kg****7. What kind of place do you live in?**

- In the city centre
- City, outside city centre
- Countryside, church village or municipal centre
- Countryside, outside the church village or the municipal centre

**8. What do you think you will do, when you finish comprehensive school?**

- Try to enter general upper secondary school
- Try to enter vocational school/work
- Try to get an apprenticeship
- Double examination (e.g. general upper secondary school and vocational school)
- Get a job
- Be unemployed
- I don't know

**9. What was your average school grade (all subjects) in the most recent school report?**

- < 6,5
- 6,5 - 6,9
- 7,0 - 7,4
- 7,5 - 7,9
- 8,0 - 8,4
- 8,5 - 8,9
- 9,0 - 9,4
- 9,5 - 10,0

**10. What was your grade from your physical education lessons in the most recent school report?**

- 4
- 5
- 6
- 7
- 8
- 9
- 10

**11. At present, how many minutes are you physically active in a week during school hours?**

\_\_\_\_\_ minutes (calculate a sum of the compulsory and optional school physical education, e.g., 2x45 min.=90 minutes)

**12. Would you say your health is...?**

- excellent
- good
- fair
- poor

**13. How fit do you think you are?**

- very fit
- fit
- moderately fit
- Not fit at all

**14. Do you think your body is...?**

- Much too thin
- A bit too thin
- About the right size
- a bit too fat
- Much too fat

**15. Do you ever feel lonely?**

- Yes , very often
- Yes, quite often
- Yes, sometimes
- No

**16. During the last month, have you taken any medicine or tablets for the following?**

|              | No                       | Yes, once                | Yes, more than once      |
|--------------|--------------------------|--------------------------|--------------------------|
| headache     | <input type="checkbox"/> | <input type="checkbox"/> | <input type="checkbox"/> |
| stomach ache | <input type="checkbox"/> | <input type="checkbox"/> | <input type="checkbox"/> |

|                                  |                          |                          |                          |
|----------------------------------|--------------------------|--------------------------|--------------------------|
| Difficulties in getting to sleep | <input type="checkbox"/> | <input type="checkbox"/> | <input type="checkbox"/> |
| nervousness                      | <input type="checkbox"/> | <input type="checkbox"/> | <input type="checkbox"/> |
| ache, due to a sports injury     | <input type="checkbox"/> | <input type="checkbox"/> | <input type="checkbox"/> |
| something else                   | <input type="checkbox"/> | <input type="checkbox"/> | <input type="checkbox"/> |

**17. During the past 12 months, how many times were you in a physical fight?**

- I have not been in a physical fight in last 12 months
- 1 time
- 2 times
- 3 times
- 4 times or more

**18. How many computers do your family own (including laptops and tablets, not including game consoles and smartphones)?**

- None
- One
- Two
- More than two

**19. Does your family own a car, van or truck?**

- No
- Yes

**20. Do you have your own bedroom for yourself?**

- No
- Yes

**21. How many times did you and your family travel out of [insert country here] for a holiday/vacation last year?**

- Not at all
- Once
- Twice
- More than twice

**22. How easy is it for you to talk to the following persons about things that really bother you? Please tick one box for each line.**

|                                     | Very easy                | Easy                     | Difficult                | Very Difficult           | I Don't have or see this person |
|-------------------------------------|--------------------------|--------------------------|--------------------------|--------------------------|---------------------------------|
| Father                              | <input type="checkbox"/> | <input type="checkbox"/> | <input type="checkbox"/> | <input type="checkbox"/> | <input type="checkbox"/>        |
| Stepfather (or mother's boyfriend)  | <input type="checkbox"/> | <input type="checkbox"/> | <input type="checkbox"/> | <input type="checkbox"/> | <input type="checkbox"/>        |
| Mother                              | <input type="checkbox"/> | <input type="checkbox"/> | <input type="checkbox"/> | <input type="checkbox"/> | <input type="checkbox"/>        |
| Stepmother (or father's girlfriend) | <input type="checkbox"/> | <input type="checkbox"/> | <input type="checkbox"/> | <input type="checkbox"/> | <input type="checkbox"/>        |

**PHYSICAL ACTIVITY**

In the following questions physical activity is any activity that increases heart rate and makes you get out of breath some of the time. Physical activity can be done in sports, school activities, playing with friends, or walking to school. Some examples of physical activity are running, brisk walking, roller skating, cycling, dancing, skateboarding, swimming, skiing, football, basketball and Finnish baseball.

**23. Over the past 7 days, on how many days were you physically active for a total of (at least) 60 minutes per day? Please add up all the time you spent in physical activity each day.**

0 days 1 2 3 4 5 6 7 days

**24. How many days in a regular week are you physically active for a total of (at least) 60 minutes per day?? Mark down only one option.**

0 days 1 2 3 4 5 6 7 days

**25. Do you think you will participate in sports or other physical activities when you are 20 years old?**

- Definitely yes
- Probably yes
- Probably no
- Definitely not

**26. How far is your way to school (home to school)?**

- Less than 500m
- 500m-1 kilometre
- 1,1-2 km
- 2,1-3 km
- 3,1-4 km
- 4,1-5 km
- more than 5 km

**27. How do you travel to school during this time of the year? (mark only the most used)**

- walking
- cycling
- car driven by my parents
- scooter, moped or micro car
- other motor vehicle, like bus

**28. On a daily basis, how long does it take for you to travel to school by walking, cycling or by other means that require you to be physically active? (total time for going and coming from school)**

- not at all
- less than 20 minutes a day
- 20–39 minutes a day
- 40–59 minutes a day
- hour a day or more

**29. Outside school hours: how often do you usually exercise in your free time so much that you get out of breath or sweat?**

- Everyday
- 4-6 times a week
- 2-3 times a week
- once a week
- once a month
- Less than once a month
- Never

**30. Outside school hours: how many hours per week do you usually exercise in your free time so much that you get out of breath or sweat?**

- None
- About half an hour

- About 1 hour
- About 2-3 hours
- About 4-6 hours
- About 7 hours or more

**31. Outside school hours: how often do you do the following sports in your free time? Choose the option that best describes the average situation during the last year (during the time of the year that it is appropriate to do the specific sport).**

|                                                                               | Never                    | Once a month<br>or less  | 2-3 times<br>a month     | Once<br>a week           | 2-3 times<br>a week      | 4 times a week<br>or more often |
|-------------------------------------------------------------------------------|--------------------------|--------------------------|--------------------------|--------------------------|--------------------------|---------------------------------|
| • walking                                                                     | <input type="checkbox"/> | <input type="checkbox"/> | <input type="checkbox"/> | <input type="checkbox"/> | <input type="checkbox"/> | <input type="checkbox"/>        |
| • running, jogging                                                            |                          |                          |                          |                          |                          |                                 |
| • cycling                                                                     |                          |                          |                          |                          |                          |                                 |
| • football                                                                    |                          |                          |                          |                          |                          |                                 |
| • floorball                                                                   |                          |                          |                          |                          |                          |                                 |
| • basketball                                                                  |                          |                          |                          |                          |                          |                                 |
| • Finnish baseball                                                            |                          |                          |                          |                          |                          |                                 |
| • volleyball                                                                  |                          |                          |                          |                          |                          |                                 |
| • badminton                                                                   |                          |                          |                          |                          |                          |                                 |
| • tennis                                                                      |                          |                          |                          |                          |                          |                                 |
| • table tennis                                                                |                          |                          |                          |                          |                          |                                 |
| • gym, weight training                                                        |                          |                          |                          |                          |                          |                                 |
| • swimming                                                                    |                          |                          |                          |                          |                          |                                 |
| • other aquatic activities (e.g. diving, water polo, kayaking)                |                          |                          |                          |                          |                          |                                 |
| • cross-country skiing                                                        |                          |                          |                          |                          |                          |                                 |
| • skiing, snowboarding                                                        |                          |                          |                          |                          |                          |                                 |
| • games on ice (e.g. ice hockey, ringette, bandy)                             |                          |                          |                          |                          |                          |                                 |
| • figure skating                                                              |                          |                          |                          |                          |                          |                                 |
| • gymnastics, fitness (e.g. aerobic, cheerleading, zumba)                     |                          |                          |                          |                          |                          |                                 |
| • dance                                                                       |                          |                          |                          |                          |                          |                                 |
| • yoga/Pilates                                                                |                          |                          |                          |                          |                          |                                 |
| • riding                                                                      |                          |                          |                          |                          |                          |                                 |
| • track and field                                                             |                          |                          |                          |                          |                          |                                 |
| • roller skating                                                              |                          |                          |                          |                          |                          |                                 |
| • skateboarding                                                               |                          |                          |                          |                          |                          |                                 |
| • martial arts (e.g. judo, taekwondo, karate, wrestling, boxing)              |                          |                          |                          |                          |                          |                                 |
| • golf                                                                        |                          |                          |                          |                          |                          |                                 |
| • orienteering                                                                |                          |                          |                          |                          |                          |                                 |
| • bowling                                                                     |                          |                          |                          |                          |                          |                                 |
| • outdoor games and -play (e.g. parkour, sledging, tobogganing, Frisbee golf) |                          |                          |                          |                          |                          |                                 |
| • motor sports                                                                |                          |                          |                          |                          |                          |                                 |
| • something else, what?                                                       |                          |                          |                          |                          |                          |                                 |

**32. In a typical week: How often does your mother (or step- mother, if your mother does not live in your primary home)...**

|                                                                                  | Never                    | Rarely                   | Sometimes                | Often                    | Very often               | <input type="checkbox"/> I don't<br>have<br>or don't<br>meet her |
|----------------------------------------------------------------------------------|--------------------------|--------------------------|--------------------------|--------------------------|--------------------------|------------------------------------------------------------------|
| Encourages you to<br>be physically active<br>or to play sports                   | <input type="checkbox"/> | <input type="checkbox"/> | <input type="checkbox"/> | <input type="checkbox"/> | <input type="checkbox"/> |                                                                  |
| Gives you a ride to a place<br>where you can be physically<br>active/exercise or |                          |                          |                          |                          |                          |                                                                  |

the place of your sport

Is physically active/exercises  
or plays sports  
with you

**33. On a typical week: How often does your father (or step-father, if your father does not live in your primary home)...**

|                                                                | Never                    | Rarely                   | Sometimes                | Often                    | Very often               | <input type="checkbox"/> I don't<br>have<br>or don't<br>meet him |
|----------------------------------------------------------------|--------------------------|--------------------------|--------------------------|--------------------------|--------------------------|------------------------------------------------------------------|
| Encourages you to<br>be physically active<br>or to play sports | <input type="checkbox"/> | <input type="checkbox"/> | <input type="checkbox"/> | <input type="checkbox"/> | <input type="checkbox"/> |                                                                  |

|                                                                                                             |                          |                          |                          |                          |                          |  |
|-------------------------------------------------------------------------------------------------------------|--------------------------|--------------------------|--------------------------|--------------------------|--------------------------|--|
| Gives you a ride to a place<br>where you can be physically<br>active/exercise or<br>the place of your sport | <input type="checkbox"/> | <input type="checkbox"/> | <input type="checkbox"/> | <input type="checkbox"/> | <input type="checkbox"/> |  |
|-------------------------------------------------------------------------------------------------------------|--------------------------|--------------------------|--------------------------|--------------------------|--------------------------|--|

|                                                               |                          |                          |                          |                          |                          |  |
|---------------------------------------------------------------|--------------------------|--------------------------|--------------------------|--------------------------|--------------------------|--|
| Is physically active/exercises<br>or plays sports<br>with you | <input type="checkbox"/> | <input type="checkbox"/> | <input type="checkbox"/> | <input type="checkbox"/> | <input type="checkbox"/> |  |
|---------------------------------------------------------------|--------------------------|--------------------------|--------------------------|--------------------------|--------------------------|--|

**34. here is a list of the reasons that some young people give for taking part in physical activity in their free time. For each reason please tick how important it is for you. Please tick one box for each line.**

| I exercise//I'm physically active because... | Very important           | Fairly important         | Not important            |
|----------------------------------------------|--------------------------|--------------------------|--------------------------|
| to have fun                                  | <input type="checkbox"/> | <input type="checkbox"/> | <input type="checkbox"/> |
| to be good in sport                          | <input type="checkbox"/> | <input type="checkbox"/> | <input type="checkbox"/> |
| to win                                       | <input type="checkbox"/> | <input type="checkbox"/> | <input type="checkbox"/> |
| to make new friends                          | <input type="checkbox"/> | <input type="checkbox"/> | <input type="checkbox"/> |
| to improve my health                         | <input type="checkbox"/> | <input type="checkbox"/> | <input type="checkbox"/> |
| to see my friends                            | <input type="checkbox"/> | <input type="checkbox"/> | <input type="checkbox"/> |
| to get in good shape                         | <input type="checkbox"/> | <input type="checkbox"/> | <input type="checkbox"/> |
| to look good                                 | <input type="checkbox"/> | <input type="checkbox"/> | <input type="checkbox"/> |
| I enjoy the feeling of using my body         | <input type="checkbox"/> | <input type="checkbox"/> | <input type="checkbox"/> |
| to please my parents                         | <input type="checkbox"/> | <input type="checkbox"/> | <input type="checkbox"/> |
| to be cool                                   | <input type="checkbox"/> | <input type="checkbox"/> | <input type="checkbox"/> |
| to control my weight                         | <input type="checkbox"/> | <input type="checkbox"/> | <input type="checkbox"/> |
| it is exciting                               | <input type="checkbox"/> | <input type="checkbox"/> | <input type="checkbox"/> |
| to lose weight                               | <input type="checkbox"/> | <input type="checkbox"/> | <input type="checkbox"/> |
| to gain muscle mass                          | <input type="checkbox"/> | <input type="checkbox"/> | <input type="checkbox"/> |

## SPORTS

The following questions concern mainly the hobby you do within your sports club. Choose the option that best describes you or your team/group. Mark your answer with an X or by writing your answer over the line.

**35. What is your primary sport (the sport that you do the most)?** \_\_\_\_\_

**36a. Do you take part in other sports (within a sports club)?**

Yes, my 2nd sport is: \_\_\_\_\_, my 3th sport is: \_\_\_\_\_,  
my 4th sport is : \_\_\_\_\_  No

**36 b. If you answered no, would you be willing to take up another sport (within a sports club)?**

- Yes  
 No

**36 c. If you answered yes, what is the main reason for not having another sport hobby within a sport club at present?**

- I just have not figured it out yet  
 Because of my primary sport, I don't have time  
 My coach has told me not to take part in another sport  
 It would be too expensive and my family can't afford it  
 Some other reason, what? \_\_\_\_\_

**37. What is the name of the sports club you do your primary sport within? (select from below)**

- Jyväskylä xxx sports club...  
 Tampere xxx...  
 etc.

**38. At what age did you start your primary sport (e.g. 12-years-old)?**

\_\_\_\_\_ years old

**The following questions concern your primary sport, unless otherwise mentioned.**

**39. What is the level of the league or games you take part in?**

- National  
 Other than national, such as 1th division  
 Local/district  
 Neighbourhood/city  
 No/we don't take part in games/competitions

**40. On a typical week, how many times do you have...**

- a) coach-led training \_\_\_\_\_ times (none = 0 times)  
b) games/competitions \_\_\_\_\_ times  
c) self-directed training \_\_\_\_\_ times

**41. What is the duration of a typical training?**

- a) coach-lead training \_\_\_\_\_ minutes (1 hour = 60 minutes)  
b) self-directed training \_\_\_\_\_ minutes

**42. In your spare time, in addition to your primary sport: how often are you physically active in a week? (at least ½ an hour so that your sweat)**

- a) other sports \_\_\_\_\_ times (none = 0 times)  
b) self-directed training e.g. playing with friends  
(other than self-directed training of the primary sport). \_\_\_\_\_ times

**43. How often do you perform warm up and cool down?**

**Warm up**

- a) organized (coach-led)  every time  
 almost always  
 every now and then  
 never



- b) self-directed
- every time
  - almost always
  - every now and then
  - never

**Cool down**

- a) organized (coach-led)
- every time
  - almost always
  - every now and then
  - never

- b) self-directed
- every time
  - almost always
  - every now and then
  - never

**44. What are your competitive goals as an athlete? Select your highest goal.**

- I don't have competitive goals, doing sports is a hobby to me
- I don't have competitive goals, I play sports to improve physical fitness
- Competitive success at junior local or district level/ Competitive success at junior national level
- Competitive success at junior international level
- Competitive success as an adult at national level competitions
- Competitive success as an adult at the international level (European, world championships or professional athlete)

**45a. Have you ever had a conversation with your coach concerning your long term competitive goals?**

- Yes
- No

**45b. If you answered yes, did your coach tell you what it takes regarding a) training and b) life outside training?**

- a) training
- yes
  - no

**b) life outside training**

- c)  yes
- d)  no

**45c. If you answered no, would you have liked for your coach to discuss your goals as an athlete with you??**

- Yes
- No

**46. Do you train enough with relation to your goals?**

- Yes
- No

**47. How far is the journey from your home to the main training location of your primary sport? Accuracy of 1 kilometre**

- less than 500m
- 500m-1 kilometre
- 1,1-2 km
- 2,1-3 km
- 3,1-4 km
- 4,1-5 km
- 5,1-6 km
- 6,1-7 km
- 7,1-8 km
- more than 8 km

**48. At this time of the year, how do you mainly travel the journey from home to the training location? (choose one, the most frequently used mode of travel)**

- walking
- cycling
- by car with my parents
- scooter, moped or micro car
- other motor vehicle

**49. How much time does the travel from home to the location of your training usually take when you walk, cycle or use other ways of travelling that demands physical activity? (trip there and back in total)**

- I do not travel that demands physical activity
- less than 20 minutes a day
- 20–39 minutes a day
- 40–59 minutes a day
- one hour a day or more

**50. Over the last 12 months, how many times have you come across violence or threat of violence in sports?**

- not at all
- 1 time
- 2 times
- 3 times
- 4 times or more

**51. Do you have the possibility to visit a sports psychologist through your sports club?**

- Yes
- No
- I don't know

**52. Over the last 12 months, how many times have you had a discussion with a sports psychologist about matters concerning your sport participation?**

- not at all
- 1 time
- 2 times
- 3 times
- 4 times or more

## HEALTH PROMOTION ACTIVITY OF THE COACHES

**53. How many coaches are there in your group/team?**

- 1
- 2
- 3
- 4 or more

**54. How long has the head coach been your/your teams' coach?**

- less than a year
- 1-2 years
- 3-4 years
- 5 years or longer

**55. In your opinion, over the last 6 months, how often has your head coach taken into account the following matters during training/games?**

**never                      rarely                      often                      very often**

- a) coach-led training load is too heavy
- b) coach underlines that training should be fun
- c) coach has told us not to chat during training
- e) coach makes sure that training is safe
- d) training takes place at a suitable time of the day
- f) the whole group/team trains in a same way
- g) the best in our group/team get more attention from our coach
- i) coach underlines, that other athletes should be respected
- h) coach give negative feedback every time someone make a mistake/fails
- j) coach always acts, if someone in our group/team breaks the rules of our sport

**56. In your opinion, over the last 6 months, how often has your head coach taken into account the following matters during non-performance time within club activities, i.e. time other than practice/competition, such as locker room or excursion activities?**

**never                      rarely                      often                      really often**

- a) There is a balance between trainings/games and rest days on weekly basis
- b) Coach instructs what to eat while eating together
- c) Coach motivates us to be socially interactive with the team/group members outside practice/competition
- d) Exertion caused by school work is in balance with relation to training; i.e., individual's total weekly exertion is in balance
- e) coach discuss on health issues also with parents
- f) coach recognises matters outside sports with relation to coaching
- g) coach always intervene in possible use of snuff or smoking
- i) coach have given us a lecture or separate info on some health topic
- j) coach has given information leaflets on some health topic
- k) outside expert has been talking to us about health issues
- l) coach has talked to us about risks of substance use

**57. In your opinion, over the last 6 months, how often has your head coach discussed at least basic issues on the following health topics with your team/group (in individual sports with you)?**

**never                      rarely                      often                      really often**

- a) physically active lifestyle
- b) nutrition
- c) smoking
- e) alcohol

- d) snuff
- f) drugs
- g) doping
- h) sleep/rest
- j) injury prevention
- i) hygiene
- k) risks of training while ill/sick
- l) violence that relates to sport in question
- m) sexual issues

## HEALTH BEHAVIOUR AND OTHER HOBBIES

**58. How many hours a day do you sit during a regular day at school? Sum up all time spent sitting down such as lessons, at school, breaks, and other time spent in school. Write down the hours, with ½ an hour accuracy.**

\_\_\_\_ hours

**59. How many hours a day do you spend sitting down in front of a television, computer/tablet, phone or other similar device? Write down the hours, with ½ an hour accuracy to each device separately for school day and weekend.**

### SCHOOLDAY

Morning before school

\_\_\_\_ hours TV, videos or DVD

\_\_\_\_ hours computer or console games (including phone and tablet games)

\_\_\_\_ hours computer/tablet (other than playing games, for example chatting, internet, e-mail, homework)

Afternoon and evening after school

\_\_\_\_ hours TV, videos or DVD

\_\_\_\_ hours computer or console games (including phone and tablet games)

\_\_\_\_ hours computer/tablet (other than playing games, for example chatting, internet, e-mail, homework)

Estimate how many hours do you spend sitting on before going to school and after school on a regular school day

\_\_\_\_ hours

### WEEKEND

Morning and afternoon (6AM-6PM)

\_\_\_\_ hours TV, videos or DVD

\_\_\_\_ hours computer or console games (including phone and tablet games)

\_\_\_\_ hours computer/tablet (other than playing games, for example chatting, internet, e-mail, homework)

Evening (6PM-Midnight)

\_\_\_\_ hours TV, videos or DVD

\_\_\_\_ hours computer or console games (including phone and tablet games)

\_\_\_\_ hours computer/tablet (other than playing games, for example chatting, internet, e-mail, homework)

Late evening/night (Midnight-6AM)

\_\_\_\_ hours TV, videos or DVD

\_\_\_\_\_ hours computer or console games (including phone and tablet games)  
 \_\_\_\_\_ hours computer/tablet (other than playing games, for example chatting, internet, e-mail, homework)

Estimate how many hours do you spend sitting on a regular weekend day  
 \_\_\_\_\_ hours

**60. How often do you usually have breakfast (more than a glass of milk or fruit juice)? Please tick one option for weekdays and one for weekend**

**Schooldays**

- I never eat breakfast during the week
- one day
- two days
- three days
- four days
- five days

**Weekend**

- I never have breakfast during the weekend
- I usually have breakfast on only one day of the weekend (Saturday OR Sunday)
- I usually have breakfast on both weekend days (Saturday AND Sunday)

**61. How often do you skip school lunch in a regular school week?**

- Not once; I usually always eat lunch at school
- once a week
- twice a week
- three days a week
- four days a week
- five days a week

**62. How often do you usually drink or eat the following things? Mark down one option for each food/drink.**

|  | Never | Less than<br>once<br>a week | Once<br>a week | 2-4<br>days<br>a week | 5-6<br>days<br>a week | Every day,<br>once<br>a day | Every day,<br>more than<br>once |
|--|-------|-----------------------------|----------------|-----------------------|-----------------------|-----------------------------|---------------------------------|
|--|-------|-----------------------------|----------------|-----------------------|-----------------------|-----------------------------|---------------------------------|

salad

fruit

vegetables

candy (candy or chocolate)

soft-drinks or other soda,

that contain sugar

dark bread (rye bread, rye crisp etc.)

hamburgers or hot dogs

potato or corn chips

energy drinks (such as Battery, Red Bull)

sports drinks

non-fat milk, low fat milk or semi-skimmed milk

full fat milk

pizza

vitamins

other dietary supplements (such as protein, maltodextrin, creatine or similar)

**63. How often do you brush your teeth?**

- More than once a day  
 Once a day  
 At least once a week, but not daily  
 Less than once a week  
 Never

**64. Have you experienced toothache or some other mouth related complaint over the last 12 months ?**

- Yes  
 No

**65. When do you usually go to bed... (select the right time)**

a) **If you have to go to school the next morning? (but no training or games/competition)?**

At the latest  
21.00    21.30    22.00    22.30    23.00    23.30    24.00    00.30    01.00    01.30    02.00 or later

---

b) **If you have to go to school the next morning (and there is a training or games/competition where you live; no travelling needed)?**

At the latest  
21.00    21.30    22.00    22.30    23.00    23.30    24.00    00.30    01.00    01.30    02.00 or later

---

c) **on Friday or Saturday evenings, when you have an early morning start the next day due to training, game or competition?**

At the latest  
21.00    21.30    22.00    22.30    23.00    23.30    24.00    00.30    01.00    01.30    02.00 or later

---

d) **On Friday or Saturday evenings, when you are free from training the next day?**

At the latest  
21.00    21.30    22.00    22.30    23.00    23.30    24.00    00.30    01.00    01.30    02.00 or later

---

**66. When do you usually go to bed...**

a) **On Friday or Saturday evenings, when you have had training or game/competition?**

At the latest  
21.00    21.30    22.00    22.30    23.00    23.30    24.00    00.30    01.00    01.30    02.00 or later

---

b) **On Friday or Saturday evenings, when you are free from training the next day?**

At the latest  
latest 21.00    21.30    22.00    22.30    23.00    23.30    24.00    00.30    01.00    01.30    02.00 or later

---

**67. When do you usually wake up on school mornings?\_?**

no later than

05.00      05.30   06.00      06.30      07.00      07.30      08.00 or later

**68. At what time do you usually wake up ...****a)      on a school day after coming home late, due to late training session or game/competition**no later  
than 05.00

05.30   06.00   06.30      07.00      07.30      08.00      08.30      09.00      09.30   10.00

**b)      Saturday or Sunday mornings, when I have training or game/competition**

no later than

05.00      05.30   06.00   06.30   07.00   07.30   08.00      08.30      09.00      09.30      10.00

10.30   11.00   11.30   12.00   12.30   13.00      13.30   14.00  
or later**c)      Saturday or Sunday mornings, when I don't have training or game/competition**

no later than

05.00      05.30   06.00   06.30   07.00   07.30   08.00   08.30   09.00   09.30   10.00

10.30   11.00   11.30   12.00   12.30   13.00   13.30      14.00  
or later**69. Have you ever smoked tobacco? (at least one tobacco, cigar or tobacco pipe)**

- Yes                       No

**70. How often do you smoke tobacco at present?**

- Every day  
 At least once a week, but not every day  
 Less than once a week  
 I do not smoke

**71. Have you ever tried snuff?**

- No I haven't tried  
 I have tried once or twice  
 I have tried more than twice

**72. Do you use presently use snuff?**

- Yes very day  
 Yes every week, but not dailyz  
 Yes, but less than once a week  
 I don't use snuff

**73. Have you ever tried alcohol?**

- No  
 Yes I have tried

**74. In total, how often do you use alcohol, for example half a bottle of medium strength beer or more?**

- Once a week or more often  
 Few times a month  
 Approx. once a month  
 Less than once a month  
 I don't use alcohol

**75. Have you ever had so much alcohol, that you have been really drunk?**

- No never  
 Yes, once  
 Yes, 2-3 times  
 Yes, 4-10 times  
 Yes, more than 10 times

**76. Outside of school hours: How often do you do the following things? Select the option that describes the situation for you during the last 12 months (at the time it is possible to do the mentioned activity).**

|                                                       | Never                    | Once<br>a month<br>or less | 2-3 x<br>a month         | Once<br>a week           | 2-3 x<br>a week          | 4 x<br>a week<br>or more |
|-------------------------------------------------------|--------------------------|----------------------------|--------------------------|--------------------------|--------------------------|--------------------------|
| • Watching TV/DVD                                     | <input type="checkbox"/> | <input type="checkbox"/>   | <input type="checkbox"/> | <input type="checkbox"/> | <input type="checkbox"/> | <input type="checkbox"/> |
| • Using computer                                      | <input type="checkbox"/> | <input type="checkbox"/>   | <input type="checkbox"/> | <input type="checkbox"/> | <input type="checkbox"/> | <input type="checkbox"/> |
| • Spending time with friends                          | <input type="checkbox"/> | <input type="checkbox"/>   | <input type="checkbox"/> | <input type="checkbox"/> | <input type="checkbox"/> | <input type="checkbox"/> |
| • Taking care of pets                                 | <input type="checkbox"/> | <input type="checkbox"/>   | <input type="checkbox"/> | <input type="checkbox"/> | <input type="checkbox"/> | <input type="checkbox"/> |
| • Listening to music                                  | <input type="checkbox"/> | <input type="checkbox"/>   | <input type="checkbox"/> | <input type="checkbox"/> | <input type="checkbox"/> | <input type="checkbox"/> |
| • Playing music or singing                            | <input type="checkbox"/> | <input type="checkbox"/>   | <input type="checkbox"/> | <input type="checkbox"/> | <input type="checkbox"/> | <input type="checkbox"/> |
| • the scouts/4H/etc.                                  | <input type="checkbox"/> | <input type="checkbox"/>   | <input type="checkbox"/> | <input type="checkbox"/> | <input type="checkbox"/> | <input type="checkbox"/> |
| • crafts/building/handiworks                          | <input type="checkbox"/> | <input type="checkbox"/>   | <input type="checkbox"/> | <input type="checkbox"/> | <input type="checkbox"/> | <input type="checkbox"/> |
| • reading                                             | <input type="checkbox"/> | <input type="checkbox"/>   | <input type="checkbox"/> | <input type="checkbox"/> | <input type="checkbox"/> | <input type="checkbox"/> |
| • going to movies/theatre/<br>concerts                | <input type="checkbox"/> | <input type="checkbox"/>   | <input type="checkbox"/> | <input type="checkbox"/> | <input type="checkbox"/> | <input type="checkbox"/> |
| • cooking                                             | <input type="checkbox"/> | <input type="checkbox"/>   | <input type="checkbox"/> | <input type="checkbox"/> | <input type="checkbox"/> | <input type="checkbox"/> |
| • disco/going out dancing                             | <input type="checkbox"/> | <input type="checkbox"/>   | <input type="checkbox"/> | <input type="checkbox"/> | <input type="checkbox"/> | <input type="checkbox"/> |
| • art (e.g. painting/drawing)                         | <input type="checkbox"/> | <input type="checkbox"/>   | <input type="checkbox"/> | <input type="checkbox"/> | <input type="checkbox"/> | <input type="checkbox"/> |
| • camping/hunting/fishing                             | <input type="checkbox"/> | <input type="checkbox"/>   | <input type="checkbox"/> | <input type="checkbox"/> | <input type="checkbox"/> | <input type="checkbox"/> |
| • photography                                         | <input type="checkbox"/> | <input type="checkbox"/>   | <input type="checkbox"/> | <input type="checkbox"/> | <input type="checkbox"/> | <input type="checkbox"/> |
| • sports spectating<br>competitions/games at the site | <input type="checkbox"/> | <input type="checkbox"/>   | <input type="checkbox"/> | <input type="checkbox"/> | <input type="checkbox"/> | <input type="checkbox"/> |
| • riding a moped                                      | <input type="checkbox"/> | <input type="checkbox"/>   | <input type="checkbox"/> | <input type="checkbox"/> | <input type="checkbox"/> | <input type="checkbox"/> |
| • Games (e.g. board games,<br>sudoku, crosswords)     | <input type="checkbox"/> | <input type="checkbox"/>   | <input type="checkbox"/> | <input type="checkbox"/> | <input type="checkbox"/> | <input type="checkbox"/> |
| • something else, what?                               | <input type="checkbox"/> | <input type="checkbox"/>   | <input type="checkbox"/> | <input type="checkbox"/> | <input type="checkbox"/> | <input type="checkbox"/> |

**THANK YOU FOR YOUR ANSWERS!!!**
